# Supplementary material for: Multicentre Randomised trial of Acute Stroke treatment in the Ambulance with a nitroglycerin Patch (MR ASAP): study protocol for a randomised controlled trial
Source: Springer Nature journal article supplement (doi:10.1186/s13063-019-3419-z), 2019-06-26
Supplement: MOESM1 [file 16856778]

**Supplementary Figure 1. Schedule of enrolment, interventions and assessments**

| TIMEPOINT                           | STUDY PERIOD                                                                        |   |   |     |    |
|-------------------------------------|-------------------------------------------------------------------------------------|---|---|-----|----|
|                                     | 0                                                                                   | 1 | 3 | 5-7 | 90 |
| <b>ENROLMENT:</b>                   |                                                                                     |   |   |     |    |
| <i>Eligibility screen</i>           | X                                                                                   |   |   |     |    |
| <i>Allocation</i>                   | X                                                                                   |   |   |     |    |
| <i>Informed consent</i>             | 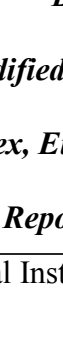 |   |   |     |    |
| <b>INTERVENTIONS:</b>               |                                                                                     |   |   |     |    |
| <i>Nitroglycerin patch</i>          |  |   |   |     |    |
| <b>ASSESSMENTS:</b>                 |                                                                                     |   |   |     |    |
| <i>Stroke severity (NIHSS)</i>      | X                                                                                   | X |   |     |    |
| <i>Blood pressure</i>               |  |   |   |     |    |
| <i>modified Rankin Scale</i>        |                                                                                     |   |   | X   | X  |
| <i>Barthel Index, EuroQol-5D-5L</i> |                                                                                     |   |   |     | X  |
| <i>Reporting of SAEs</i>            |  |   |   |     |    |

NIHSS: National Institutes of Health Stroke Scale; SAEs: Serious Adverse Events
