# Supplementary material for: Multicentre Randomised trial of Acute Stroke treatment in the Ambulance with a nitroglycerin Patch (MR ASAP): study protocol for a randomised controlled trial
Source: Springer Nature journal article supplement (doi:10.1186/s13063-019-3419-z), 2019-06-26
Supplement: MOESM2 [file 16856778]

**Supplementary Table 1. Comparison of MR ASAP trial with RIGHT-2 trial**

| <b>Criteria</b>          | <b>MR ASAP</b>                                            | <b>RIGHT-2</b>                                                                   |
|--------------------------|-----------------------------------------------------------|----------------------------------------------------------------------------------|
| Design                   | Open-label, blinded endpoint, multicentre                 | Sham, blinded endpoint, multicentre                                              |
| Screen for eligibility   | Paramedic                                                 | Paramedic                                                                        |
| Treatment initiation     | Paramedic                                                 | Paramedic                                                                        |
| Informed consent         | Deferred informed consent in hospital by patient or proxy | Informed consent by paramedic by patient, or proxy consent by relative/paramedic |
| Eligibility criteria     |                                                           |                                                                                  |
| <i>Age</i>               | $\geq 18$                                                 | $\geq 18$                                                                        |
| <i>FAST</i>              | <i>2 or 3</i>                                             | <i>2 or 3</i>                                                                    |
| <i>SBP</i>               | $\geq 140$ mm Hg                                          | $\geq 120$ mm Hg                                                                 |
| <i>Time to treatment</i> | <i>&lt; 3 hours</i>                                       | <i>&lt; 4 hours</i>                                                              |
| <i>GCS</i>               | <i>8-15</i>                                               | <i>8-15</i>                                                                      |
| Randomisation            | Electronic device                                         | Identical treatment packs                                                        |
| GTN patch brand          | Deponit-T                                                 | Transiderm-Nitro                                                                 |
| Dose                     | 5 mg / 24 hours                                           | 5 mg / 24 hours                                                                  |
| Duration of treatment    | 24 hours                                                  | 4 days                                                                           |
| Sample size              | 1400                                                      | 850                                                                              |
| Primary outcome          | 90 day mRS, ordinal regression                            | 90 day mRS, ordinal regression                                                   |

FAST: Face Arm Speech Test; GCS: Glasgow Coma Scale; GTN: Glyceryl Trinitrate; mRS: modified Rankin Scale; MR ASAP: Multicentre Randomised trial of Acute Stroke treatment in the Ambulance with a nitroglycerin Patch; RIGHT-2: Rapid Intervention With Glyceryl Trinitrate in Hypertensive Stroke-2; SBP: systolic blood pressure
