# Supplementary material for: Multicentre Randomised trial of Acute Stroke treatment in the Ambulance with a nitroglycerin Patch (MR ASAP): study protocol for a randomised controlled trial
Source: Springer Nature journal article supplement (doi:10.1186/s13063-019-3419-z), 2019-06-26
Supplement: MOESM3 [file 16856778]

**Additional File 3: List of CONTRAST work package leaders**

| <b>Principal Investigator</b>    | <b>Organisation</b>                |
|----------------------------------|------------------------------------|
| Beusekom, Heleen van, PhD        | Erasmus MC Experimental Cardiology |
| Buskens, Erik, MD PhD            | UMCG Epidemiology                  |
| Cate, Hugo ten, MD PhD           | MUMC Thrombosis Expertise Center   |
| Dammers, Ruben, MD PhD           | Erasmus MC Neurosurgery            |
| Dippel, Diederik MD PhD          | Erasmus MC Neurology               |
| Dijkhuizen, Rick, PhD            | UMCU Center for Image Sciences     |
| Kappelle, Jaap, MD PhD           | UMCU Neurology                     |
| Klijn, Karin, MD PhD             | UMCN Neurology                     |
| Koudstaal, Peter, MD PhD         | Erasmus MC Neurology               |
| Lingsma, Hester, PhD             | Erasmus MC Public Health           |
| Lugt, Aad van der, MD PhD        | Erasmus MC Radiology               |
| Luijckx, Gert Jan, MD PhD        | UMCG Neurology                     |
| Maat, Moniek de, PhD             | Erasmus MC Hematology              |
| Majoie, Charles, MD PhD          | Amsterdam UMC Radiology            |
| Nederkoorn, Paul, MD PhD         | Amsterdam UMC Neurology            |
| Oostenbrugge, Robert van, MD PhD | MUMC Neurology                     |
| Roos, Yvo, MD PhD                | Amsterdam UMC Neurology            |
| Vivien, Denis, MD PhD            | UNC INSERM                         |
| Worp, Bart van der, MD PhD       | UMCU Neurology                     |
| Zwam, Wim van, MD PhD            | MUMC Radiology                     |
